# Supplementary material for: Música: Dvorák: el canto de Bohemia
Source: Royal Society of Chemistry journal article supplement (doi:10.1039/d2fo01136k), 2004-01-01
Supplement: d2fo01136k1.pdf [file d2fo01136k1.pdf]

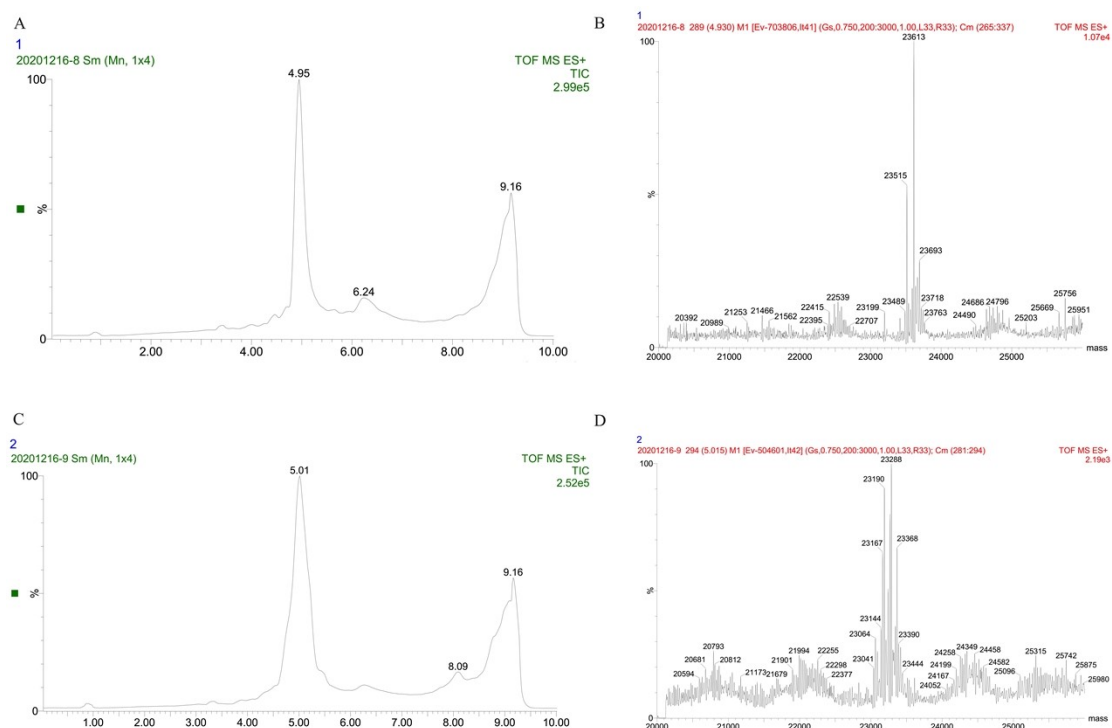

Figure S1. LC-MS characterization of purified  $\alpha_{S1}$ -casein. A: UPLC of cow's milk  $\alpha_{S1}$ -casein; B: Mass spectra of cow's milk  $\alpha_{S1}$ -casein; C: UPLC of goat's milk  $\alpha_{S1}$ -casein; D: Mass spectra of goat's milk  $\alpha_{S1}$ -casein.

Table S1. Sequence of primers in quantitative real-time reverse transcription polymerase chain reaction.

|                | Forward primer (5'-3')   | Reverse primer (5'-3')  |
|----------------|--------------------------|-------------------------|
| $\beta$ -actin | GGCTGTATTCCCCTCCATCG     | CCAGTTGGTAACAATGCCATGT  |
| T-bet          | AGCAAGGACGGCGAATGTT      | GGGTGGACATATAAGCGGTTTC  |
| GATA3          | CTCGGCCATTTCGTACATGGAA   | GGATACCTCTGCACCGTAGC    |
| NF- $\kappa$ B | ATGGCAGACGATGATCCCTAC    | TGTTGACAGTGGTATTTCTGGTG |
| Ocln           | TTGAAAGTCCACCTCCTTACAGA  | CCGGATAAAAAGAGTACGCTGG  |
| Foxp3          | CCCATCCCCAGGAGTCTTG      | ACCATGACTAGGGGCACTGTA   |
| claudin-1      | GGGGACAACATCGTGACCG      | AGGAGTCGAAGACTTTGCACT   |
| claudin-2      | CCTCGCTGGCTTGTATTATCTCTG | GAGTAGAAGTCCCGAAGGATG   |
| ZO1            | ACCACCAACCCGAGAAGAC      | CAGGAGTCATGGACGCACA     |
| ZO2            | ATGGGAGCAGTACACCGTGA     | TGACCACCCTGTCATTTTCTTG  |
| claudin-3      | ACCAACTGCGTACAAGACGAG    | CAGAGCCGCCAACAGGAAA     |
| claudin-5      | GCAAGGTGTATGAATCTGTGCT   | GTCAAGGTAACAAAGAGTGCCA  |
| TLR4           | ATGGCATGGCTTACACCACC     | GAGGCCAATTTTGTCTCCACA   |
| MyD88          | TCATGTTCTCCATAACCTTGGT   | AAACTGCGAGTGGGGTCAG     |
| TRAF-6         | AAAGCGAGAGATTCTTTCCCTG   | ACTGGGGACAATTCCTAGAGC   |
